# Supplementary material for: Phyto-SERM Constitutes from Flemingia macrophylla
Source: Int J Mol Sci. 2013 Jul 26;14(8):15578–94. doi: 10.3390/ijms140815578 (PMC3759874; doi:10.3390/ijms140815578)

## Supplementary Information

**Figure S1.** Bioactivity-guided isolation of *Flemingia macrophylla* (partition).

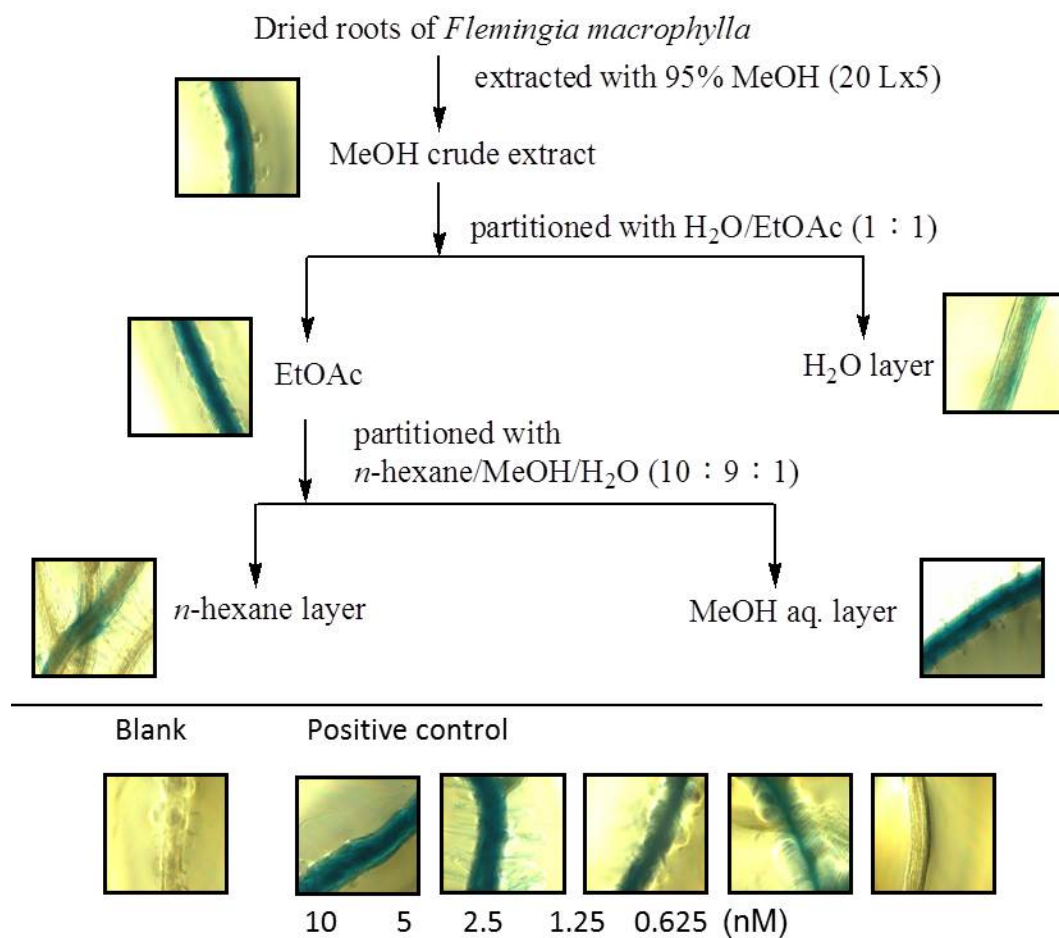

**Figure S2.** Bioactivity-guided isolation of *Flemingia macrophylla*. The transgenic plant assay system was used to determine estrogenic activity of subfractions which were isolated from MeOH layer.

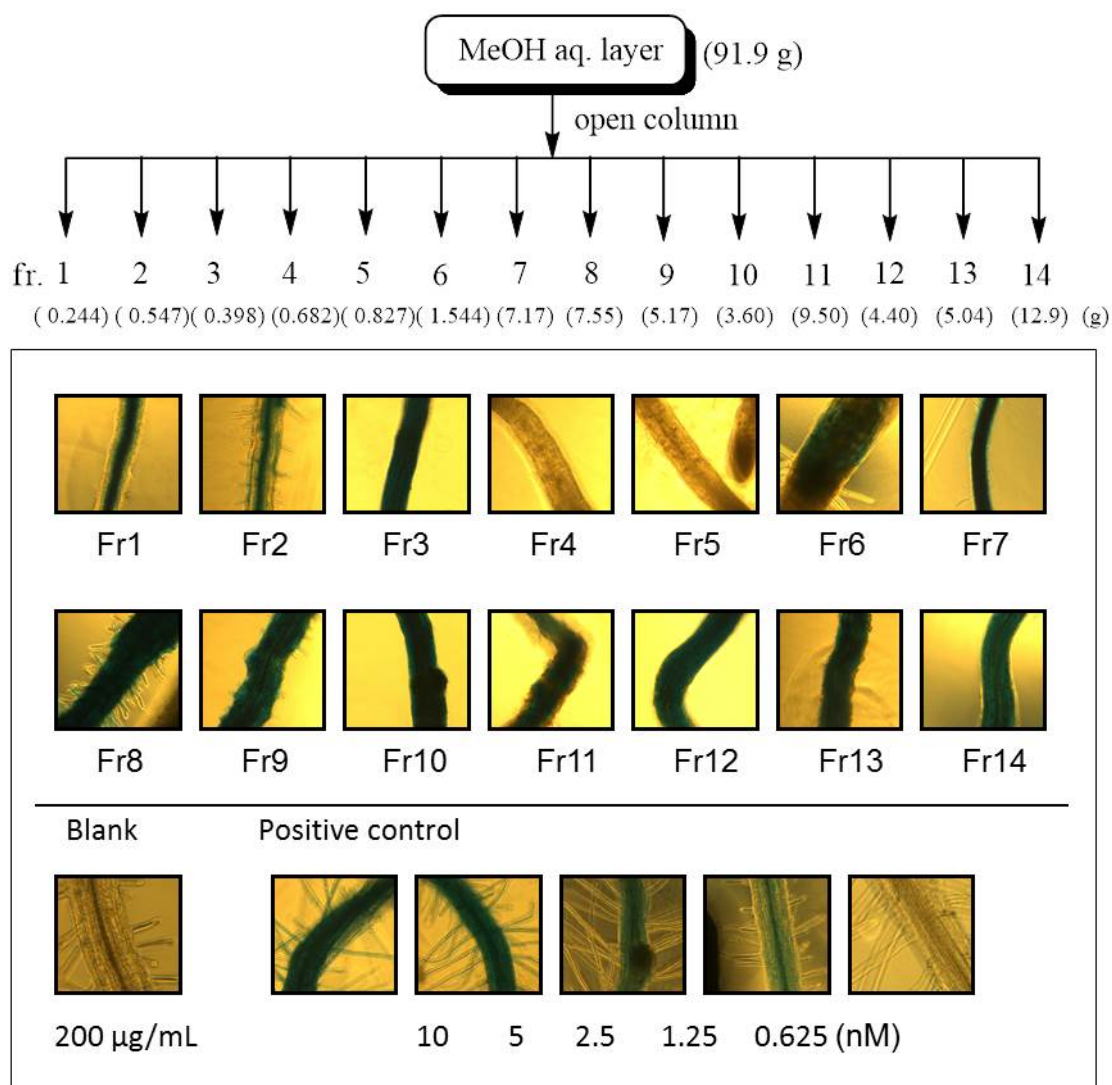

Supplement: Supplementary file 1 [file ijms-14-15578-s001.pdf]
